# Supplementary material for: Diversity of Useful Plants in Cabo Verde Islands: A Biogeographic and Conservation Perspective
Source: MDPI journal article supplement (doi:10.3390/plants11101313), 2022-05-15
Supplement: s1 [file s1]

# Diversity of Useful Plants in Cabo Verde Islands: A Biogeographic and Conservation Perspective

Maria Cristina Duarte <sup>1,\*</sup>, Isildo Gomes <sup>2</sup>, Silvia Catarino <sup>3,4</sup>, Miguel Brilhante <sup>3</sup>, Samuel Gomes <sup>2</sup>, Aline Rendall <sup>2</sup>, Ângela Moreno <sup>2</sup>, Arlindo Rodrigues Fortes <sup>5,6</sup>, Vladmir Silves Ferreira <sup>5</sup>, Isaurinda Baptista <sup>5</sup>, Herculano Dinis <sup>7</sup>, and Maria Manuel Romeiras <sup>1,3</sup>

**Table S1.** Useful plant species in Cabo Verde islands: taxonomic diversity, origin and uses.

| Cabo Verde                             | Cabo Verde | Santo Antão | São Vicente | São Nicolau | Sal | Boavista | Maio | Santiago | Fogo | Brava |
|----------------------------------------|------------|-------------|-------------|-------------|-----|----------|------|----------|------|-------|
| <b>Total flora</b>                     |            |             |             |             |     |          |      |          |      |       |
| Total taxa N <sup>o</sup> (1)          | 813        | 521         | 299         | 349         | 147 | 219      | 232  | 498      | 409  | 262   |
| <b>Useful taxa</b>                     |            |             |             |             |     |          |      |          |      |       |
| Families N <sup>o</sup>                | 88         | 83          | 51          | 63          | 41  | 45       | 45   | 76       | 65   | 59    |
| Genera N <sup>o</sup>                  | 338        | 255         | 144         | 168         | 99  | 118      | 127  | 280      | 221  | 191   |
| Taxa N <sup>o</sup>                    | 518        | 372         | 203         | 234         | 123 | 158      | 169  | 388      | 297  | 243   |
| Exotic taxa N <sup>o</sup>             | 373        | 268         | 117         | 147         | 77  | 95       | 95   | 269      | 199  | 169   |
| Native taxa N <sup>o</sup>             | 145        | 104         | 86          | 87          | 46  | 63       | 74   | 119      | 98   | 74    |
| Native non-endemic taxa N <sup>o</sup> | 107        | 268         | 117         | 147         | 77  | 95       | 95   | 269      | 199  | 169   |
| Endemic taxa N <sup>o</sup>            | 38         | 22          | 20          | 20          | 9   | 9        | 6    | 23       | 21   | 17    |
| Total uses N <sup>o</sup>              | 757        | 573         | 338         | 391         | 224 | 280      | 283  | 611      | 482  | 401   |
| Food N <sup>o</sup>                    | 158        | 124         | 71          | 75          | 48  | 65       | 62   | 131      | 104  | 90    |
| Forage / pasture N <sup>o</sup>        | 171        | 134         | 94          | 101         | 53  | 71       | 81   | 149      | 118  | 98    |
| Melliferous N <sup>o</sup>             | 71         | 63          | 42          | 49          | 29  | 38       | 36   | 70       | 58   | 54    |
| Poison N <sup>o</sup>                  | 12         | 8           | 8           | 5           | 5   | 6        | 6    | 9        | 8    | 6     |
| Social N <sup>o</sup>                  | 9          | 8           | 5           | 7           | 3   | 4        | 4    | 8        | 6    | 5     |
| Fuelwood N <sup>o</sup>                | 21         | 15          | 9           | 12          | 9   | 10       | 10   | 15       | 11   | 15    |
| Timber N <sup>o</sup>                  | 9          | 8           | 6           | 7           | 4   | 5        | 4    | 9        | 8    | 4     |
| Utilitarian N <sup>o</sup>             | 30         | 22          | 16          | 19          | 9   | 12       | 13   | 28       | 19   | 19    |
| Materials N <sup>o</sup>               | 21         | 17          | 9           | 12          | 7   | 9        | 8    | 20       | 14   | 10    |
| Ornamental N <sup>o</sup>              | 183        | 118         | 50          | 64          | 36  | 37       | 39   | 123      | 94   | 66    |
| Environmental N <sup>o</sup>           | 72         | 56          | 28          | 40          | 21  | 23       | 20   | 49       | 42   | 34    |

(1) According to Sánchez-Pinto et al. [63].

**Table S2.** Geographic, demographic and economic indicators for Cabo Verde.

| Indicators                                              | Santo Antão | São Vicente | São Nicolau | Sal    | Boavista | Maio   | Santiago | Fogo   | Brava |
|---------------------------------------------------------|-------------|-------------|-------------|--------|----------|--------|----------|--------|-------|
| Area km <sup>2</sup> <sup>(1)</sup>                     | 779         | 227         | 343         | 216    | 620      | 269    | 991      | 476    | 64    |
| Altitude m <sup>(1)</sup>                               | 1979        | 774         | 1304        | 406    | 378      | 436    | 1392     | 2829   | 976   |
| Population N <sup>o</sup> <sup>(1)</sup>                | 38194       | 84228       | 12108       | 39696  | 18792    | 7352   | 309638   | 35015  | 5463  |
| Agriculture ha <sup>(2)</sup>                           | 5036.6      | 569.4       | 999.4       | 73.5   | 275.4    | 388.6  | 20530.9  | 6731   | 518.9 |
| Forest ha <sup>(2)</sup>                                | 2177.8      | 2163.1      | 2464.1      | 356    | 1822.6   | 5446.9 | 37328.3  | 2347.4 | 813.2 |
| Rural population N <sup>o</sup> <sup>(3)</sup>          | 20904       | 6006        | 7857        | 2350   | 1657     | 3167   | 114486   | 22747  | 3222  |
| Farms N <sup>o</sup> <sup>(3)</sup>                     | 5822        | 1701        | 2096        | 544    | 509      | 898    | 26841    | 6023   | 965   |
| Rainfed farming N <sup>o</sup> <sup>(3)</sup>           | 3648        | 227         | 1427        | 274    | 107      | 467    | 20803    | 5506   | 850   |
| Irrigated farming N <sup>o</sup> <sup>(3)</sup>         | 2203        | 301         | 542         | 15     | 65       | 103    | 5093     | 154    | 104   |
| Livestock farming N <sup>o</sup> <sup>(3)</sup>         | 4571        | 1445        | 1730        | 383    | 500      | 836    | 23752    | 4946   | 585   |
| Forest holdings N <sup>o</sup> <sup>(3)</sup>           | 54          | 47          | 5           | 0      | 0        | 147    | 11361    | 2645   | 117   |
| Population using fuelwood N <sup>o</sup> <sup>(4)</sup> | 15810       | 3438        | 1731        | 0      | 233      | 2145   | 92049    | 17848  | 615   |
| Tourists N <sup>o</sup> (in 2019) <sup>(5)</sup>        | 35599       | 40074       | 902         | 353784 | 237416   | 981    | 76884    | 11468  | 874   |
| Nominal GDP (in 2017, million ECV) <sup>(1)</sup>       | 10069       | 26876       | 3324        | 21744  | 9643     | 1550   | 89987    | 8634   | 1271  |

(1) Anuário Estatístico 2019 [14].

(2) Inventário Florestal Nacional de Cabo Verde 2012 [102].

(3) V Recenseamento Geral da Agricultura 2015 [101].

(4) Estatísticas do Ambiente 2016 [99].

(5) Avaliação de Impacto da Pandemia da COVID-19 [100].
